# Supplementary material
Source: PubMed Central journal article supplement (PMC2695823)
Supplement: NIHMS89265-supplement-Supplementary_Data.pdf [file NIHMS89265-supplement-Supplementary_Data.pdf]

WEN ET AL. SUPPLEMENTAL INFORMATION

Supplemental Tables

**Supplemental Table S1.** SCG2 polymorphism location and allele frequencies across populations.

| Site # | Alleles <sup>a</sup> | Position <sup>b</sup> | Amino acid | Asian (n=45) | Black (n=55) | Hispanic (n=27) | White (n=53) | Global (n=180) | dbSNP      |
|--------|----------------------|-----------------------|------------|--------------|--------------|-----------------|--------------|----------------|------------|
| 1      | t/C                  | -725, promoter        | none       | 0            | 0.01         | 0               | 0            | 0.003          |            |
| 2      | g/A                  | -453, promoter        | none       | 0            | 0            | 0               | 0.01         | 0.003          |            |
| 3      | g/T                  | -253, promoter        | none       | 0.09         | 0.056        | 0               | 0            | 0.041          |            |
| 4      | t/C                  | -173, promoter        | none       | 0            | 0.067        | 0               | 0            | 0.021          |            |
| 5      | T13-16               | -157, promoter        | none       | NA           | NA           | NA              | NA           | NA             |            |
| 6      | t/C                  | -154, promoter        | none       | 0.09         | 0.067        | 0               | 0            | 0.044          |            |
| 7      | a/G                  | 736, intron 1         | none       | 0.045        | 0.305        | 0.04            | 0.02         | 0.127          | rs1017448  |
| 8      | t/C                  | 964, intron 1         | none       | 0            | 0.055        | 0.04            | 0.01         | 0.022          |            |
| 9      | t/C                  | 1098, intron 1        | none       | 0            | 0.056        | 0               | 0            | 0.017          |            |
| 10     | t/G                  | 1253, intron 1        | none       | 0.142        | 0.075        | 0.148           | 0.048        | 0.102          | rs2894511  |
| 11     | a/G                  | 1289, intron 1        | none       | 0            | 0            | 0.018           | 0            | 0.003          |            |
| 12     | g/A                  | 1367, intron 1        | none       | 0.048        | 0.113        | 0               | 0.01         | 0.046          |            |
| 13     | a/G                  | 1400, intron 1        | none       | 0.024        | 0.028        | 0               | 0.01         | 0.023          | rs16864981 |
| 14     | a/T                  | 1604, intron 1        | none       | 0            | 0.01         | 0               | 0            | 0.003          |            |
| 15     | c/T                  | 1624, intron 1        | none       | 0.01         | 0            | 0               | 0            | 0.003          |            |
| 16     | t/G                  | 1801, intron 1        | none       | 0            | 0.02         | 0               | 0            | 0.006          |            |
| 17     | g/A                  | 1851, intron 1        | none       | 0            | 0.036        | 0               | 0            | 0.024          |            |
| 18     | c/T                  | 1995, intron 1        | none       | 0            | 0            | 0.01            | 0.02         | 0.012          |            |
| 19     | c/T                  | 2327, intron 1        | none       | 0            | 0.01         | 0               | 0            | 0.003          |            |
| 20     | t/C                  | 2508, intron 1        | none       | 0            | 0.01         | 0               | 0.01         | 0.006          |            |
| 21     | c/T                  | 2620, intron 1        | none       | 0.01         | 0            | 0               | 0            | 0.003          | rs16864979 |
| 22     | t/C                  | 2640, intron 1        | none       | 0.01         | 0            | 0               | 0            | 0.003          |            |
| 23     | g/A                  | 2707, intron 1        | none       | 0            | 0.036        | 0               | 0            | 0.012          |            |
| 24     | c/A                  | 2843, intron 1        | none       | 0.01         | 0.036        | 0               | 0            | 0.012          | rs16864977 |
| 25     | t/C                  | 3260, exon 2          | Y-61-H     | 0.01         | 0            | 0               | 0            | 0.003          | rs16864976 |
| 26     | c/T                  | 3965, exon 2          | R-296-W    | 0            | 0            | 0.018           | 0            | 0.003          |            |
| 27     | g/A                  | 4066, exon 2          | G-329-G    | 0.01         | 0            | 0               | 0            | 0.003          |            |
| 28     | t/A                  | 4351, exon 2          | T-424-T    | 0            | 0.01         | 0               | 0            | 0.003          |            |
| 29     | c/T                  | 4366, exon 2          | D-429-D    | 0            | 0.155        | 0.038           | 0.02         | 0.058          | rs721233   |
| 30     | a/G                  | 4615, exon 2          | L-522-L    | 0.01         | 0            | 0               | 0.01         | 0.006          |            |
| 31     | a/G                  | 4698, exon 2          | E-540-G    | 0.01         | 0            | 0               | 0            | 0.003          |            |
| 32     | c/T                  | 4770, exon 2          | P-564-L    | 0            | 0            | 0               | 0.02         | 0.006          |            |
| 33     | c/T                  | 4873, exon 2          | N-598-N    | 0            | 0.028        | 0               | 0            | 0.008          | rs16864974 |
| 34     | t/C                  | 4927, exon 2          | N-616-N    | 0            | 0.018        | 0               | 0            | 0.006          | rs16864973 |
| 35     | c/A                  | 5024, exon 2 UTR      | none       | 0            | 0.155        | 0.038           | 0.02         | 0.058          | rs2230168  |
| 36     | t/C                  | 5080, exon 2 UTR      | none       | 0.01         | 0            | 0               | 0            | 0.003          |            |

<sup>a</sup>Lowercase, major allele; uppercase, minor allele. <sup>b</sup>Relative to putative cap site.

**Supplemental Table S2.** Comparison of nucleotide sequence diversity ( $\times 10^{-4}$ ) in SCG2 gene domains across populations.

| Sequenced region (bp spanned) | Asian    | Black     | Hispanic | White     | Global    |
|-------------------------------|----------|-----------|----------|-----------|-----------|
| Coding (1851 bp)              | 0.43 [4] | 2.02 [4]  | 0.6 [2]  | 0.54 (59) | 1.03 [10] |
| Promoter (1160 bp)            | 2.86 [2] | 3.27 [4]  | 0 [0]    | 0.17 [1]  | 1.87 [5]  |
| 5'-UTR (137 bp)               | 0 [0]    | 0 [0]     | 0 [0]    | 0 [0]     | 0 [0]     |
| Intron (2988 bp)              | 1.85 [8] | 4.6 [13]  | 1.6 [5]  | 0.84 [7]  | 2.65 [18] |
| 3'-UTR (423 bp)               | 0.47 [1] | 6.25 [1]  | 1.76 [1] | 0.94 [1]  | 2.73 [2]  |
| Total (6559 bp)               | 1.5 [15] | 3.65 [22] | 1.0 [8]  | 0.63 [12] | 2.01 [35] |

[ ], Number of SNPs in that region for that population.

**Supplemental Table S3.** Admixture analysis in black hypertension cases versus controls (UCSD study).

| <b>Gene (description)</b>    | <b>Chi-sq</b>  | <b>DF</b> | <b>Minor allele frequency</b> | <b>Chromosome</b> |
|------------------------------|----------------|-----------|-------------------------------|-------------------|
| ADRB2 (252 G/A rs1042717)    | 0.11           | 1         | 0.27                          | 5                 |
| FMO2 (stop)                  | 0.21           | 1         | 0.13                          | 1                 |
| CACNA1S (intron 1 rs1325309) | 1.61           | 1         | 0.49                          | 1                 |
| NOS3 (298 Glu/Asp rs1799983) | 0.78           | 1         | 0.11                          | 7                 |
| ACE (intron 17 rs4344)       | 0.34           | 1         | 0.39                          | 17                |
| ADD1 (1797 T/C rs4984)       | 0.01           | 1         | 0.21                          | 4                 |
| AGTR1/CPB1 (3'-UTR rs5186)   | 0.22           | 1         | 0.10                          | 3                 |
| DRD1 (-94 A/G rs5326)        | 2.57           | 1         | 0.21                          | 5                 |
| CHGA (3' 12602 C/G rs875395) | 0.03           | 1         | 0.32                          | 14                |
| ADRA2B (394 Gly/Gly)         | 0.15           | 1         | 0.25                          | 2                 |
| ADRB3 (64 Trp/Arg rs4994)    | 1.10           | 1         | 0.11                          | 8                 |
| PNMT (1509 G/A)              | 0.29           | 1         | 0.29                          | 17                |
| PYY (3'-UTR 2123 C/A)        | 0.33           | 1         | 0.11                          | 17                |
| CHRNA3 (intron 3)            | 0.06           | 1         | 0.42                          | 15                |
| ADRA1A (rs1048101)           | 0.10           | 1         | 0.28                          | 8                 |
| SLC18A1 (rs1497020)          | 0.79           | 1         | 0.05                          | 8                 |
| MAOB (rs1799836)             | 4.09           | 1         | 0.23                          | X                 |
| CYB561 (rs2058203)           | 0.47           | 1         | 0.38                          | 17                |
| SLC18A2 (rs363227)           | 2.57           | 1         | 0.33                          | 10                |
| KLK1 (rs5517)                | 0.84           | 1         | 0.19                          | 19                |
| SLC6A5 (NET1 rs5569)         | 0.17           | 1         | 0.17                          | 11                |
| MAOA (rs6323)                | 0.01           | 1         | 0.14                          | X                 |
| TH (81 Val/Met rs6356)       | 0.25           | 1         | 0.13                          | 11                |
| ADRA1C (347 Arg/Cys)         | 0.00           | 1         | 0.29                          | 8                 |
| CHRNA5 (rs871058)            | 0.68           | 1         | 0.07                          | 15                |
| GPRK4 (142 Ala/Val)          | 0.00           | 1         | 0.38                          | 4                 |
| RGSPX1.3.HF1.1_2             | 2.74           | 1         | 0.18                          | 16                |
| SLC9A3 (rs2247114)           | 3.35           | 1         | 0.16                          | 5                 |
| SLC9A3R1 (rs7420)            | 0.71           | 1         | 0.47                          | 17                |
| HSD11B2 (156 Thr/Thr rs5479) | 1.40           | 1         | 0.17                          | 16                |
| NR3C2 (rs5529)               | 0.21           | 1         | 0.21                          | 4                 |
| REN (rs5705)                 | 1.02           | 1         | 0.33                          | 1                 |
| AGT (rs7079)                 | 0.62           | 1         | 0.09                          | 1                 |
|                              | Sum of chi-sqs | Sum of DF | P value                       |                   |
|                              | 27.83          | 33        | 0.7233                        |                   |

**Supplemental Table S4.** Divergent SCG2 A736G genotype distribution between all unrelated male and female subjects, by chi-square.

| Genotype | Male<br>(n=1388) | Female<br>(n=1254) | Chi-square p-value |
|----------|------------------|--------------------|--------------------|
| AA       | 73 (5.3)         | 40 (3.2)           | P<0.0001           |
| GA       | 360 (25.9)       | 255 (20.3)         |                    |
| GG       | 955 (68.8)       | 959 (76.5)         |                    |
| Genotype | Male<br>(n=1388) | Female<br>(n=1254) | Chi-square p-value |
| AA+GA    | 433 (31.2)       | 295 (23.5)         | P<0.0001           |
| GG       | 955 (68.8)       | 959 (76.5)         |                    |

**Supplemental Table S5.** SOLAR analysis of the effect of SCG2 G736A on heritability of cardiovascular traits in the GenNet subjects, stratified by gender.

| GenNet variable | SCG2 SNP only | Adjusted for age | Females only SCG2 SNP only (n=476) | Males only SCG2 SNP only (n=305) | Females only SCG2 SNP & adjusted for age (n=476) | Males only SCG2 SNP & adjusted for age (n=305) |
|-----------------|---------------|------------------|------------------------------------|----------------------------------|--------------------------------------------------|------------------------------------------------|
| SBP             | 0.3996        | 0.8694           | <b>0.0447</b>                      | 0.1833                           | 0.1703                                           | 0.1269                                         |
| DBP             | 0.1930        | 0.3392           | 0.0653                             | 0.8819                           | 0.1535                                           | 0.7724                                         |
| PP              | 0.9239        | 0.5459           | 0.2492                             | <b>0.0297</b>                    | 0.5360                                           | <b>0.0207</b>                                  |
| SBP raw         | 0.1850        | 0.4965           | <b>0.0135</b>                      | 0.2150                           | 0.0659                                           | 0.1754                                         |
| SBP med         | 0.1677        | 0.5412           | <b>0.0137</b>                      | 0.2700                           | 0.0770                                           | 0.2143                                         |
| DBP raw         | 0.1163        | 0.2013           | 0.0792                             | 0.6746                           | 0.1556                                           | 0.7516                                         |
| DBP med         | 0.1026        | 0.2131           | 0.0636                             | 0.6787                           | 0.1573                                           | 0.7667                                         |
| PP raw          | 0.8831        | 0.6242           | 0.0819                             | <b>0.0302</b>                    | 0.2745                                           | <b>0.0208</b>                                  |
| PP med          | 0.7771        | 0.6553           | 0.0659                             | <b>0.0393</b>                    | 0.2599                                           | <b>0.0260</b>                                  |

Key: SBP=systolic blood pressure; DBP=diastolic blood pressure; PP=pulse pressure;  
 SBP/DBP/PP raw=without taking into account medication; SBP/DBP/PP med=correcting for medication.

**Supplemental Table S6.** Logistic regression-based gender-specific analysis of the data from all unrelated individuals in five subject cohorts.

| Genotype | Males (n=1385)<br>OR (95% CI) | Overall p-value | Females (n=1253)<br>OR (95% CI) | Overall p-value |
|----------|-------------------------------|-----------------|---------------------------------|-----------------|
| AA       | 0.63 (0.37, 1.08)             | 0.20            | 1.49 (0.71, 3.10)               | <b>0.019</b>    |
| GA       | 1.02 (0.76, 1.36)             |                 | 1.61 (1.15, 2.26)               |                 |
| GG       | 1.00                          |                 | 1.00                            |                 |
| AA+GA    | 0.95 (0.72, 1.25)             | 0.69            | 1.60 (1.15, 2.22)               | <b>0.0050</b>   |
| GG       | 1.00                          |                 | 1.00                            |                 |

Key: OR=odds ratio. Note that the genotype effects were adjusted for study and age by treating these factors as covariates in the regression analysis.

**Supplemental Table S7.** Neutrality tests for polymorphism at SCG2.

| Population      | Tajima's D | Fu's $F_s$ | Fu and Li's $D^*$ | Fu and Li's $F^*$ | Fu and Li's D | Fu and Li's F | Fay and Wu's H |
|-----------------|------------|------------|-------------------|-------------------|---------------|---------------|----------------|
| Asian (n=90)    | -1.487     | -6.883**   | -1.40986          | -1.70977          | -1.45816      | -1.75506      | -3.259*        |
| Black (n=110)   | -0.869     | -4.833**   | -0.062            | -0.428            | -0.076        | -0.446        | -3.118*        |
| Hispanic (n=54) | -1.101     | -1.078     | -0.11777          | -0.49715          | -0.14006      | -0.5204       | -3.385*        |
| White (n=106)   | -1.836*    | -5.962**   | -2.7519           | -2.88875          | -0.8455       | -1.3955       | -5.712**       |
| Global (n=360)  | -1.52      | -14.485**  | -1.42719          | -1.78364          | -1.44598      | -1.79994      | -4.637**       |

\*:  $P < 0.05$ . \*\*:  $P < 0.01$ .

**Supplemental Table S8.** SCG2 haplotype distributions across populations.

| Haplotype no. | Haplotype | Asian (n=90) | Black (n=110) | Hispanic (n=54) | White (n=106) | Global (n=360) |
|---------------|-----------|--------------|---------------|-----------------|---------------|----------------|
| 1             | GCTTG     | 0.811 (73)   | 0.573 (63)    | 0.833 (45)      | 0.934 (99)    | 0.778 (280)    |
| 2             | GCTGG     | 0.133 (12)   | 0.073 (8)     | 0.148 (8)       | 0.047 (5)     | 0.092 (33)     |
| 3             | ACTTG     | 0.011 (1)    | 0.191 (21)    | 0 (0)           | 0 (0)         | 0.061 (22)     |
| 4             | ACTTA     | 0.033 (3)    | 0.055 (6)     | 0 (0)           | 0.009 (1)     | 0.028 (10)     |
| 5             | ATTTG     | 0 (0)        | 0.055 (6)     | 0.019 (1)       | 0.009 (1)     | 0.022 (8)      |
| 6             | ACCTA     | 0 (0)        | 0.055 (6)     | 0 (0)           | 0 (0)         | 0.017 (6)      |
| 7             | GCTTA     | 0.011 (1)    | 0 (0)         | 0 (0)           | 0 (0)         | 0.003 (1)      |

## Supplemental Figures and Figure Legends.

### Supplemental Figure S1

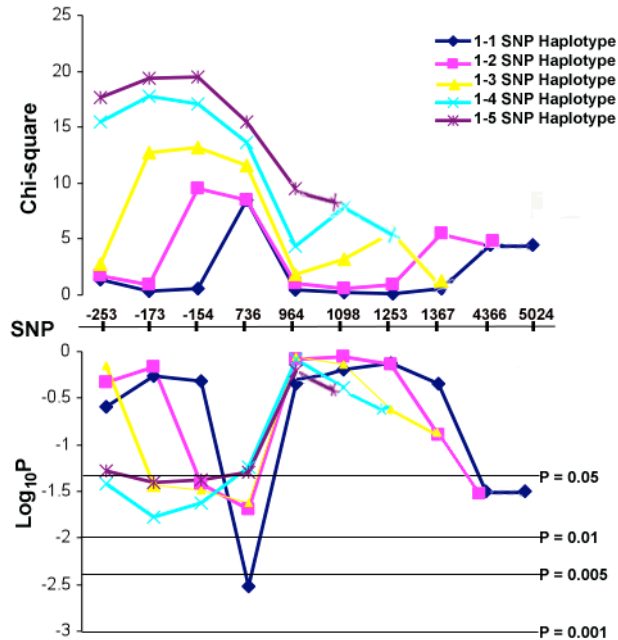

**Supplemental Figure S1. Sliding window analysis for haplotype association in African Americans.** Haplotypes were constructed with 1 to 5 consecutive variant sites from nine SNPs common in African Americans (number for each SNP denotes position; see Supplemental Table S1). Case-control haplotype association to hypertension was analyzed by program SNPPEM (<http://polymorphism.ucsd.edu/cgi-bin/PRL/snpem/snpem.cgi>) software as described (61). Upper panel shows chi-square value, low panel is converted P value with significant P values indicated.

## Supplemental Figure S2

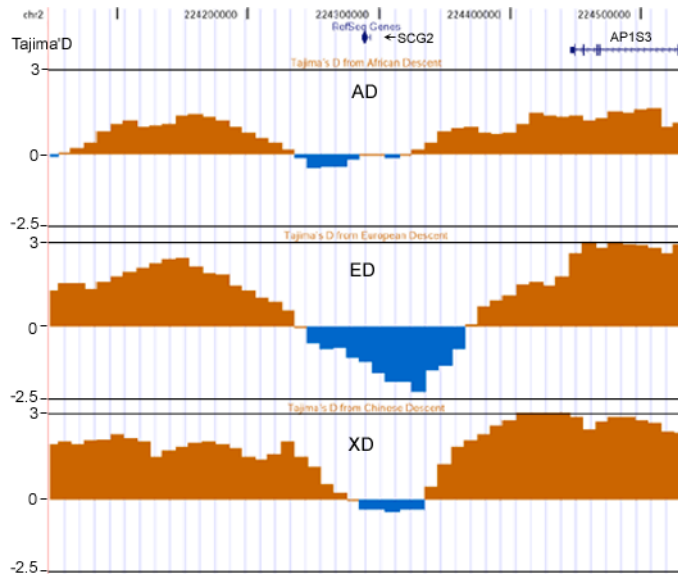

**Supplemental Figure S2. Tajima's D in sliding window format is shown across 481,860 bp of chromosome 2 centered on SCG2 from three human populations. Orange color represents positive Tajima's D (maximum is 3), while blue represents negative value (minimum is -2.5). AD: African Descent; ED: European Descent; XD: Chinese Descent.**
